# Supplementary material for: Self-organized emergence of hyaline cartilage in hiPSC-derived multi-tissue organoids
Source: bioRxiv or medRxiv preprint supplement (doi:10.1101/2021.09.21.461213), 2021-11-02
Supplement: Supplementary file [file media-10.pdf]

# Self-organized emergence of hyaline cartilage in hiPSC-derived multi-tissue organoids

## Author Information

---

Manci Li<sup>1,2</sup>, Juan E. Abrahante<sup>3</sup>, Amanda Vegoe<sup>4,5,6</sup>, Yi Wen Chai<sup>4,5,6</sup>, Beth Lindborg<sup>4,5,6</sup>, Ferenc Toth<sup>7</sup>, Peter A. Larsen<sup>1,2</sup>, Timothy D. O'Brien<sup>4,5,6</sup>

<sup>1</sup>Department of Veterinary and Biomedical Sciences, University of Minnesota, St. Paul, MN 55108

<sup>2</sup>Minnesota Center for Prion Research and Outreach, College of Veterinary Medicine, St. Paul, University of Minnesota, MN 55108

<sup>3</sup>University of Minnesota Informatics Institute, University of Minnesota, Minneapolis, MN 55455

<sup>4</sup>Stem Cell Institute, University of Minnesota, Minneapolis, MN 55455

<sup>5</sup>Department of Veterinary Population Medicine, University of Minnesota, St. Paul, MN 55108

<sup>6</sup>Sarcio, Inc., Minneapolis, MN 55455

<sup>7</sup>Department of Veterinary Clinical Sciences, University of Minnesota, St. Paul, MN 55108

**Fig. S1**

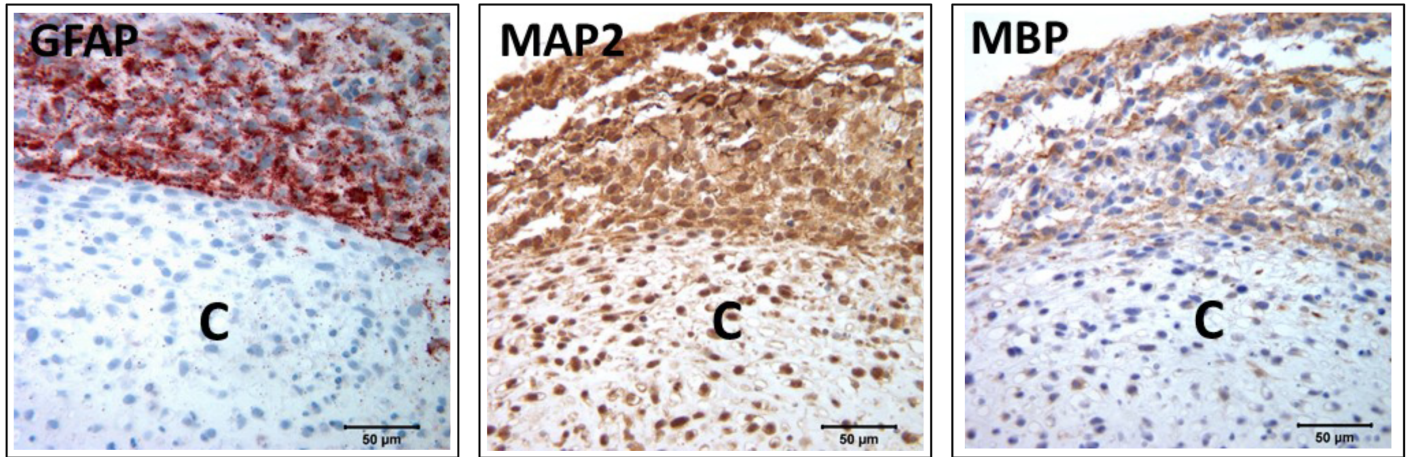

Immunohistochemical staining for brain cell lineages in 1024 MTOs at 8 weeks demonstrates strong labeling for glial fibrillary acidic protein (GFAP, astrocytes), microtubule-associated protein 2 (MAP2, neurons), and myelin basic protein (MBP, oligodendrocytes) in surface regions of the MTO adjacent to the chondrogenic region (C).

**Fig. S2**

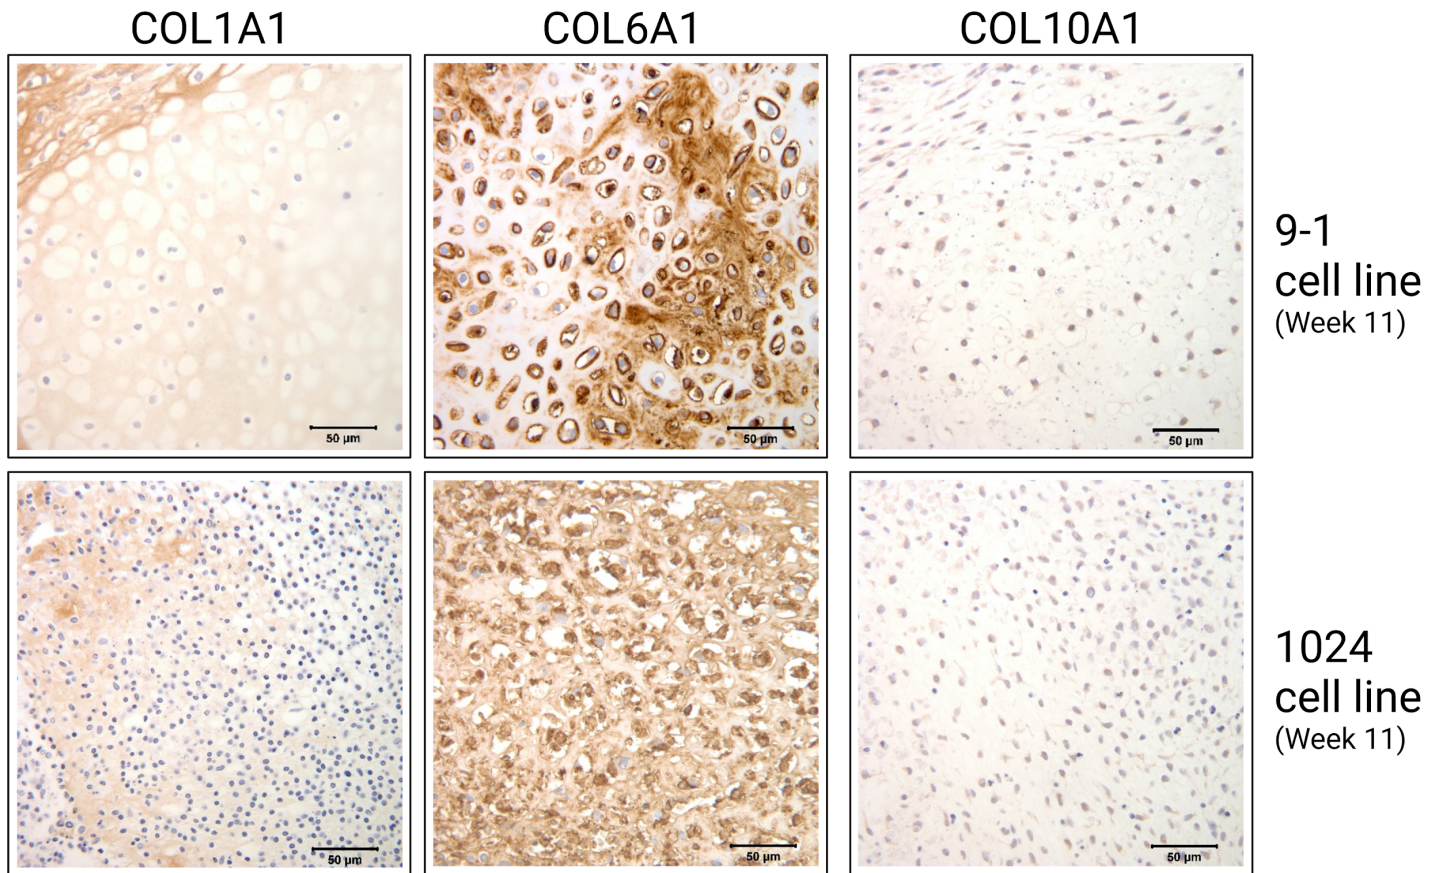

11-week MTOs from 9-1<sup>1</sup> and 1024 cell lines showing some peripheral weak to moderate staining for type I collagen (COL1A1), pericellular and some patchy matrix staining for type VI collagen (COL6A1), and negative staining for type X collagen (COL10A1).

**Fig. S3.**

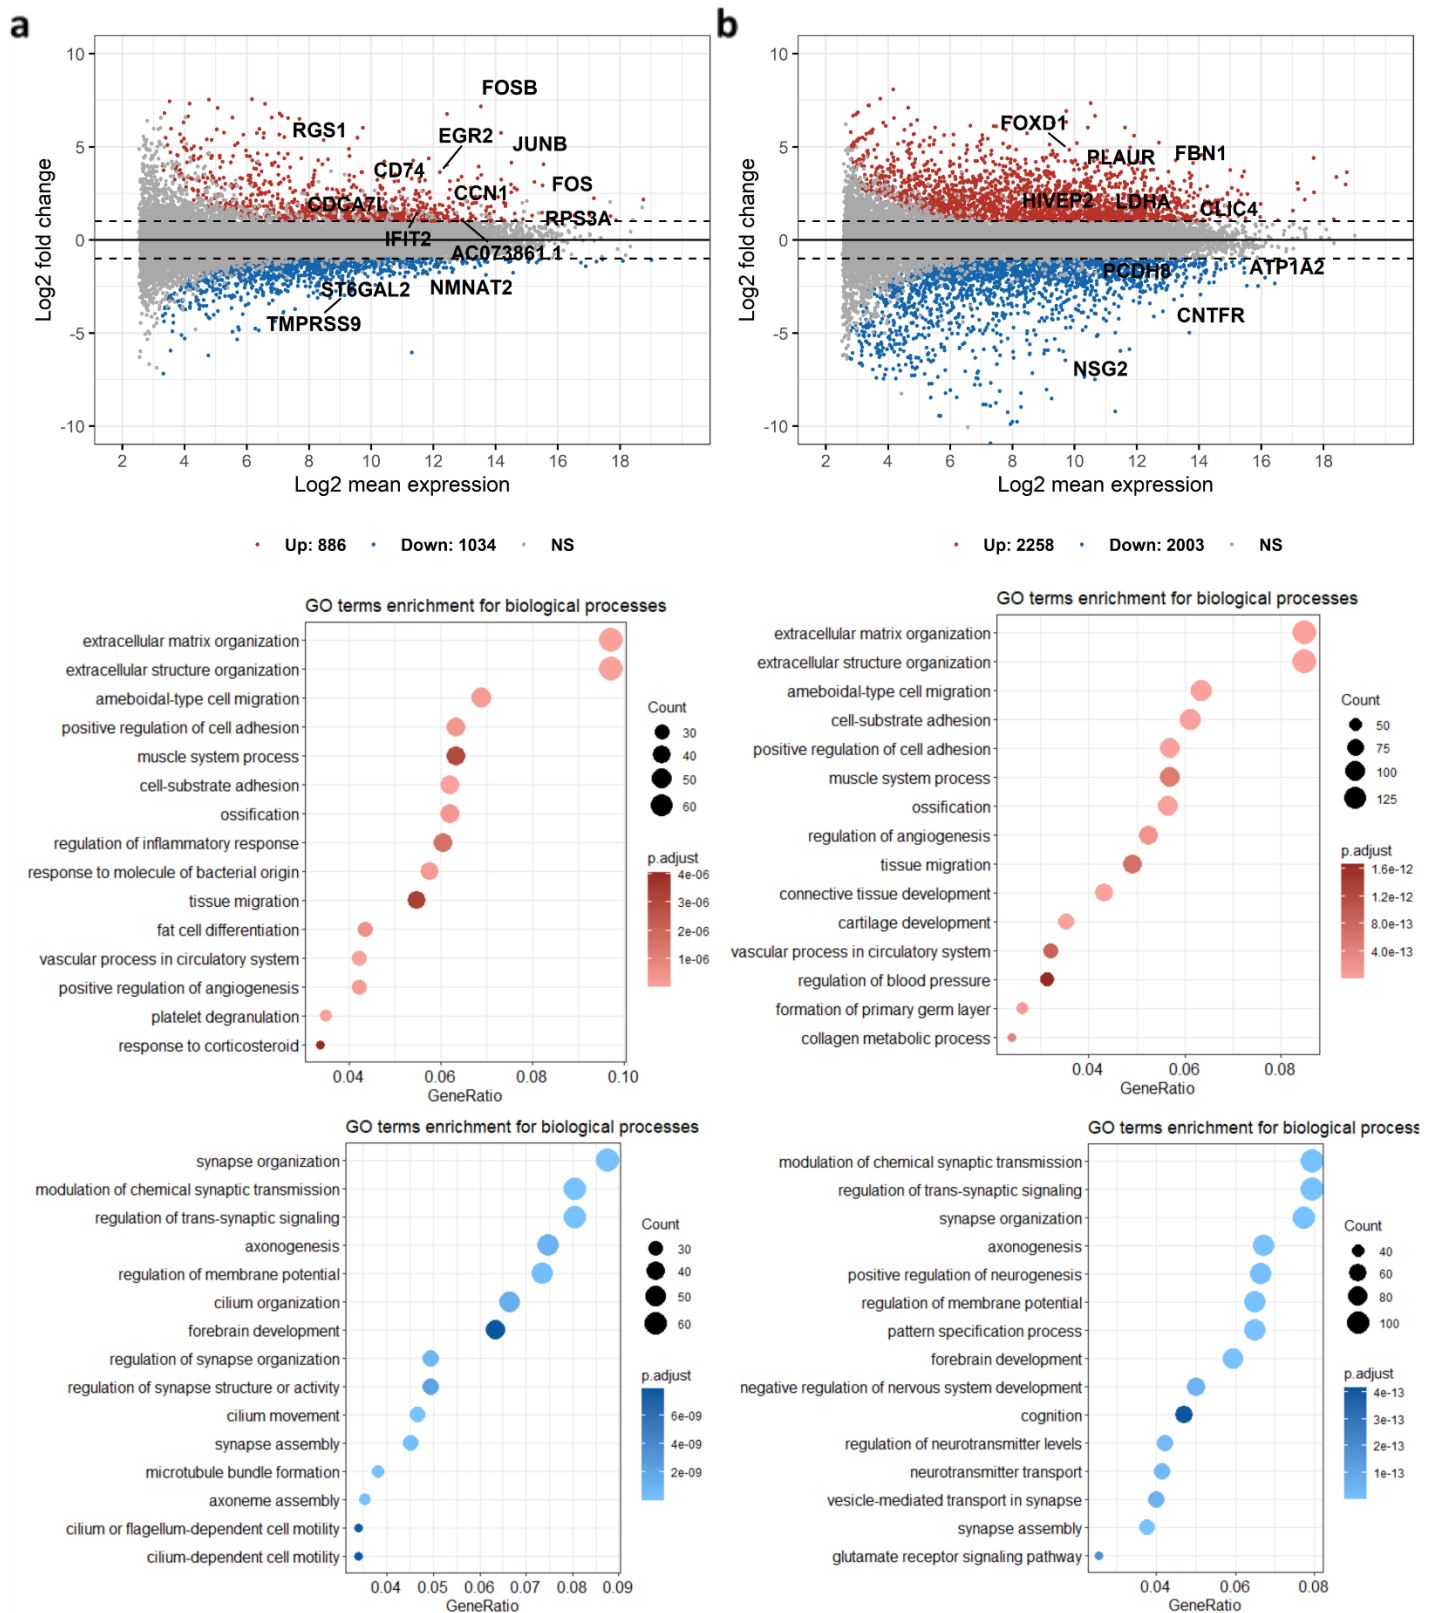

Differential gene expression and gene ontology enrichment analyses (week 11 vs week 8 and week 15 vs week 11). **a.** Differential gene expression, gene ontology enrichment for upregulated and genes, gene ontology enrichment for downregulated genes between week 11 and week 8. **b.** Differential gene expression, gene ontology enrichment for upregulated and genes, gene ontology enrichment for downregulated genes between week 15 and week 11.



**Fig S4.**

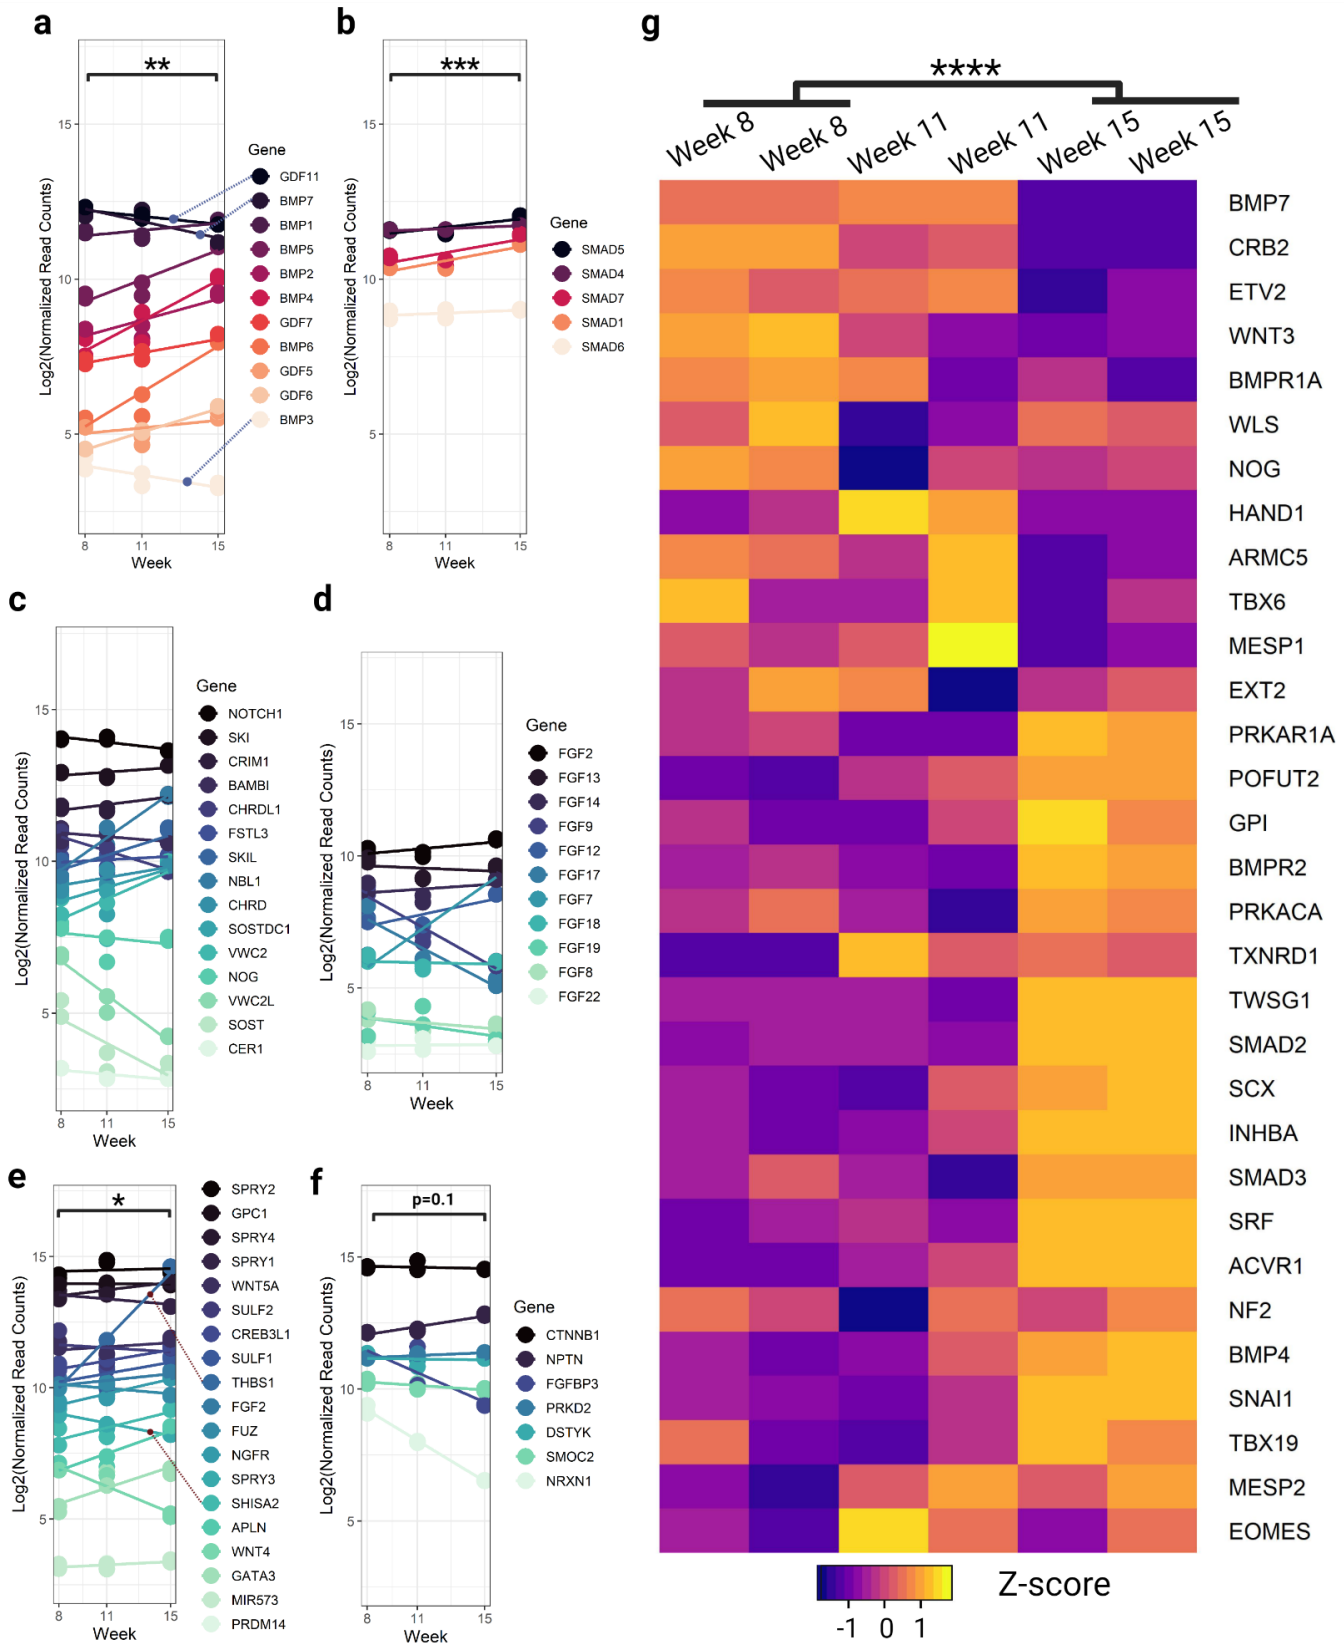

Gene expression plots of gene lists of interests. **a.** Bone morphogenic proteins (BMP). **b.** SMAD proteins. **c.** BMP antagonists. **d.** Neural FGFs. **e.** Negative regulation of FGFR pathway (GO:0040037). **f.** Positive regulation of FGFR pathway (GO:0045743). **g.** Mesoderm formation (GO:0001707).

**Table S9. Antibodies used for histology and immunohistochemistry.**

| <b>Antibody</b>                         | <b>Type of Antibody</b> | <b>Manufacturer/Cat. No.</b>               | <b>Dilution</b> | <b>Antigen Retrieval</b> |
|-----------------------------------------|-------------------------|--------------------------------------------|-----------------|--------------------------|
| Aggrecan (ACAN)                         | Goat polyclonal         | R&D Systems, Cat# AF1220                   | 1:200           | None                     |
| Type I Collagen (COL1A1)                | Mouse monoclonal        | Sigma c2456                                | 1:100           | Proteinase K             |
| Type II Collagen (COL2A1)               | Mouse monoclonal        | Developmental Studies Hybridoma Bank CIIC1 | 1:10            | Pepsin                   |
| Type VI Collagen (COL6A1)               | Rabbit polyclonal       | abcam ab6588                               | 1:400           | Citrate                  |
| Type X Collagen (COL10A1)               | Rabbit polyclonal       | abcam ab58632                              | 1:400           | Typsin                   |
| Glial Fibrillary Acidic Protein (GFAP)  | Rabbit polyclonal       | Dako Cat.#Z0334                            | 1:1000          | None                     |
| Microtubule Associated Protein 2 (MAP2) | Chicken polyclonal      | abcam ab5392                               | 1:4000          | Citrate                  |
| Myelin Basic Protein (MBP)              | Rabbit polyclonal       | abcam ab40390                              | 1:3000          | Citrate                  |

**Reference:**

1. Lindborg, B. A. *et al.* Rapid Induction of Cerebral Organoids From Human Induced Pluripotent Stem Cells Using a Chemically Defined Hydrogel and Defined Cell Culture Medium. 694–702 (2016).
